# Supplementary material
Source: publisher figshare collection journal article supplement (https://gsapubs.figshare.com/ndownloader/files/23298668)
Supplement: Supplementary file 1 [file 23298668]

## **GSA DATA REPOSITORY 2015065**

### **1. RADIOCARBON DATING**

Thin section analysis was used to screen for diagenesis with only pristine coral samples used for AMS  $^{14}\text{C}$  dating. The foraminifera species *Baculogypsina sphaerulata* and 6 mollusc shells (where foraminifera were not as prevalent, Table DR1) were also selected for the sediment cores for AMS  $^{14}\text{C}$  dating. Near-pristine samples that have undergone the least amount of surficial transport and abrasion were selected under microscope where possible in order to minimize the disparity between death and postmortem deposition. All  $^{14}\text{C}$  radiocarbon ages from samples in this study and the Marshall and Davies (1982) cores were corrected to calibrated years BP (cal. yr. BP) with  $2\sigma$  age ranges using the Marine13 data set (Reimer et al. 2013) with a marine reservoir correction of  $\Delta R = 4 \pm 40$  yr (Druffel and Griffin, 2004) and the calibration program Calib 7.0.2 (Stuiver et al., 2005).

Table DR1:  $^{14}\text{C}$  AMS radiocarbon dating results showing conventional and calibrated radiocarbon ages. Samples include foraminifera and mollusc shells from sediment cores and corals from fossil microatolls and buried patch-reefs. Different codes relate to the laboratory that conducted the dating with OZ codes from the Australian Nuclear Science and Technology Organisation (ANSTO) (Fink et al., 2004) and UBA codes from the  $^{14}\text{C}$  CHRONO Centre at Queen's University, Belfast. Locations are in GDA 1994 MGA Zone 56.

| Sample Number | Sample Code | Code      | X      | Y       | Elevation (MSL) | Sample Type       | Radiocarbon Age ( $^{14}\text{C}$ BP) | $^{14}\text{C}$ 1 $\sigma$ error | Median Calibrated $^{14}\text{C}$ age | 2 $\sigma$ range (cal yr. BP) |
|---------------|-------------|-----------|--------|---------|-----------------|-------------------|---------------------------------------|----------------------------------|---------------------------------------|-------------------------------|
| 1             | C5          | OZN404    | 406884 | 7399781 | -0.946          | Foraminifera      | 1030                                  | 80                               | 603                                   | 474 - 753                     |
| 2             | C5          | OZN405    | 406884 | 7399781 | -0.996          | Mollusc           | 3305                                  | 50                               | 3138                                  | 2956 - 3322                   |
| 3             | C5          | UBA-15989 | 406884 | 7399781 | -1.166          | Bivalve Veneridae | 960                                   | 68                               | 558                                   | 441 - 670                     |
| 4             | C5          | UBA-15988 | 406884 | 7399781 | -1.276          | Bivalve Veneridae | 3693                                  | 72                               | 3606                                  | 3402 - 3821                   |
| 5             | C5          | OZN406    | 406884 | 7399781 | -1.216          | Mollusc           | 1030                                  | 40                               | 600                                   | 610 - 680                     |
| 6             | C5          | OZN407    | 406884 | 7399781 | -1.276          | Foraminifera      | 2580                                  | 90                               | 2245                                  | 1977 - 2532                   |
| 7             | C5          | OZN408    | 406884 | 7399781 | -1.436          | Foraminifera      | 2140                                  | 110                              | 1722                                  | 1428 - 1993                   |
| 8             | C5          | OZN409    | 406884 | 7399781 | -1.596          | Foraminifera      | 3670                                  | 60                               | 3576                                  | 3390 - 3774                   |
| 9             | C7          | OZO089    | 404736 | 7400428 | -1.166          | Foraminifera      | 1170                                  | 45                               | 718                                   | 624 - 866                     |
| 10            | C7          | OZO090    | 404736 | 7400428 | -1.256          | Foraminifera      | 1180                                  | 40                               | 725                                   | 635 - 863                     |
| 11            | C7          | OZO091    | 404736 | 7400428 | -1.336          | Foraminifera      | 615                                   | 40                               | 250                                   | 90 - 407                      |
| 12            | C7          | OZO092    | 404736 | 7400428 | -1.686          | Foraminifera      | 2380                                  | 45                               | 2005                                  | 1844 - 2160                   |
| 13            | C7          | OZO093    | 404736 | 7400428 | -1.986          | Foraminifera      | 765                                   | 40                               | 398                                   | 290 - 491                     |
| 14            | C7          | OZO094    | 404736 | 7400428 | -2.236          | Foraminifera      | 1050                                  | 40                               | 614                                   | 519 - 701                     |
| 15            | C7          | OZO095    | 404736 | 7400428 | -2.616          | Foraminifera      | 1990                                  | 45                               | 1547                                  | 1388 - 1697                   |
| 16            | C12         | OZO096    | 406137 | 7399803 | -0.586          | Foraminifera      | 490                                   | 40                               | 113                                   | 1 - 239                       |
| 17            | C12         | OZO097    | 406137 | 7399803 | -0.646          | Foraminifera      | 500                                   | 45                               | 124                                   | 1 - 246                       |
| 18            | C12         | OZO098    | 406137 | 7399803 | -0.916          | Foraminifera      | 785                                   | 40                               | 414                                   | 291 - 508                     |
| 19            | C12         | OZO099    | 406137 | 7399803 | -1.016          | Foraminifera      | 3180                                  | 40                               | 2971                                  | 2816 - 3143                   |
| 20            | C12         | OZO100    | 406137 | 7399803 | -1.436          | Foraminifera      | 3500                                  | 40                               | 3380                                  | 3230 - 3530                   |
| 21            | C14         | OZO101    | 406103 | 7400310 | -0.936          | Foraminifera      | 580                                   | 40                               | 201                                   | 45 - 319                      |
| 22            | C14         | OZO102    | 406103 | 7400310 | -1.276          | Foraminifera      | 855                                   | 45                               | 476                                   | 322 - 565                     |
| 23            | C14         | OZO103    | 406103 | 7400310 | -1.466          | Foraminifera      | 610                                   | 660                              | 239                                   | 54 - 416                      |
| 24            | C14         | OZO104    | 406103 | 7400310 | -1.636          | Foraminifera      | 845                                   | 45                               | 467                                   | 317 - 553                     |
| 25            | C14         | OZO105    | 406103 | 7400310 | -2.096          | Foraminifera      | 3060                                  | 45                               | 2829                                  | 2716 - 2976                   |

| Sample Number | Sample Code | Code      | X      | Y       | Elevation (MSL) | Sample Type      | Radiocarbon Age ( $^{14}\text{C}$ BP) | $^{14}\text{C}$ 1 $\sigma$ error | Median Calibrated $^{14}\text{C}$ age | 2 $\sigma$ range (cal yr. BP) |
|---------------|-------------|-----------|--------|---------|-----------------|------------------|---------------------------------------|----------------------------------|---------------------------------------|-------------------------------|
| 26            | C15         | OZO106    | 404700 | 7400951 | -1.056          | Foraminifera     | 775                                   | 40                               | 407                                   | 295 - 497                     |
| 27            | C15         | OZO107    | 404700 | 7400951 | -1.226          | Foraminifera     | 990                                   | 60                               | 577                                   | 475 - 677                     |
| 28            | C15         | OZO108    | 404700 | 7400951 | -1.626          | Foraminifera     | 2105                                  | 50                               | 1681                                  | 1527 - 1838                   |
| 29            | C15         | OZO109    | 404700 | 7400951 | -1.776          | Foraminifera     | 2850                                  | 45                               | 2598                                  | 2409 - 2738                   |
| 30            | C15         | OZP109    | 404700 | 7400951 | -2.796          | Foraminifera     | 2430                                  | 45                               | 2066                                  | 1912 - 2263                   |
| 31            | C3          | UBA-15986 | 406847 | 7399893 | -2.236          | Acropora         | 658                                   | 68                               | 301                                   | 105 - 467                     |
| 32            | C3          | UBA-15987 | 406847 | 7399893 | -2.616          | Tridacnea crocea | 1031                                  | 68                               | 602                                   | 489 - 726                     |
| 33            | C3          | OZP106    | 406847 | 7399893 | -0.586          | Foraminifera     | 1410                                  | 35                               | 955                                   | 817 - 1085                    |
| 34            | C6          | OZP107    | 404729 | 7400179 | -1.586          | Foraminifera     | 3340                                  | 40                               | 3188                                  | 3021 - 3343                   |
| 35            | C6          | UBA-15990 | 404729 | 7400179 | -0.866          | Fragum fragum    | 662                                   | 69                               | 305                                   | 106 - 472                     |
| 36            | C6          | UBA-15991 | 404729 | 7400179 | -1.096          | Fragum fragum    | 1122                                  | 68                               | 679                                   | 531 - 838                     |
| 37            | C18         | OZP110    | 406154 | 7400089 | -1.236          | Foraminifera     | 2780                                  | 50                               | 2516                                  | 2341 - 2688                   |
| 38            | C18         | OZP111    | 406154 | 7400089 | -1.526          | Foraminifera     | 670                                   | 45                               | 319                                   | 146 - 165                     |
| 39            | C18         | OZP112    | 406154 | 7400089 | -2.656          | Foraminifera     | 2290                                  | 40                               | 1899                                  | 1745 - 2050                   |
| 40            | Atoll A01   | OZP785    | 407618 | 7400032 | 0.134           | Porites?         | 2565                                  | 35                               | 2230                                  | 2092 - 2345                   |
| 41            | Atoll A08   | OZP786    | 406864 | 7402303 | -0.116          | Porites          | 3520                                  | 40                               | 3403                                  | 3255 - 3548                   |
| 42            | Atoll A94   | OZP787    | 406755 | 7402381 | 0.022           | Porites          | 2870                                  | 40                               | 2625                                  | 2443 - 2748                   |
| 43            | Atoll A2    | OZP788    | 407639 | 7400031 | 0.014           | Porites?         | 3895                                  | 40                               | 3864                                  | 3693 - 4038                   |
| 44            | Atoll A99   | OZP789    | 407688 | 7400195 | -0.03           | Favites          | 2920                                  | 40                               | 2694                                  | 2495 - 2809                   |
| 45            | Patch P2    | OZP790    | 406772 | 7399933 | -0.626          | Cyphastrea       | 3185                                  | 35                               | 2978                                  | 3831 - 3142                   |
| 46            | Patch P4    | OZP791    | 406778 | 7399879 | -0.566          | Favia?           | 3410                                  | 35                               | 3273                                  | 3128 - 3405                   |
| 47            | Patch P6    | OZP792    | 405793 | 7400081 | -0.516          | Isopora          | 2780                                  | 35                               | 2517                                  | 2349 - 2676                   |
| 48            | Patch P7    | OZP793    | 405757 | 7400256 | -0.956          | Leptoria         | 2460                                  | 40                               | 2106                                  | 1960 - 2285                   |
| 49            | Patch P14   | OZP794    | 404803 | 7400473 | -0.546          | Montipora?       | 5440                                  | 40                               | 5807                                  | 5658 - 5922                   |
| 50            | Patch P16   | OZP795    | 404665 | 7400953 | -0.906          | Platygyra?       | 2180                                  | 35                               | 1769                                  | 1617 - 1896                   |

Table DR2: Conventional radiocarbon ages from Marshall and Davies (1982) cores 1, 2, and 4 and their calibrated ages.

| Sample Number | Sample Code  | Lab Code | Lat      | Long     | Elevation (MSL) | Sample Type | Radiocarbon Age ( $^{14}\text{C}$ BP) | $^{14}\text{C}$ 1 $\sigma$ error | Calibrated $^{14}\text{C}$ age | 2 $\sigma$ range (cal yr. BP) |
|---------------|--------------|----------|----------|----------|-----------------|-------------|---------------------------------------|----------------------------------|--------------------------------|-------------------------------|
| 1             | Core 1 1_28B | NSW-319  | -23.5089 | 152.0910 | -5.2            | Sand        | 3760                                  | 146                              | 3697                           | 3346 - 4079                   |
| 2             | Core 1 1_35C | NSW-314  | -23.5089 | 152.0910 | -8.3            | Sand        | 5280                                  | 126                              | 5647                           | 5380 - 5906                   |
| 3             | Core 4 1D    | GX-6951  | -23.6069 | 152.0959 | -0.6            | Coral       | 4155                                  | 141                              | 4218                           | 3827 - 4602                   |
| 4             | Core 4 1F    | GX-6952  | -23.6069 | 152.0959 | -0.98           | Coral       | 4010                                  | 155                              | 4025                           | 3605 - 4428                   |
| 5             | Core 4 1G    | GX-6953  | -23.6069 | 152.0959 | -1.16           | Coral       | 3910                                  | 141                              | 3890                           | 3522 - 4283                   |
| 6             | Core 4 2E    | GX-6954  | -23.6069 | 152.0959 | -1.83           | Coral       | 3700                                  | 146                              | 3623                           | 3251 - 3992                   |
| 7             | Core 4 3C    | GX-6955  | -23.6069 | 152.0959 | -3.25           | Coral       | 4020                                  | 155                              | 4038                           | 3613 - 4440                   |
| 8             | Core 4 4B    | GX-6956  | -23.6069 | 152.0959 | -4.34           | Coral       | 4265                                  | 146                              | 4367                           | 3982 - 4782                   |
| 9             | Core 4 5D    | GX-6957  | -23.6069 | 152.0959 | -5.4            | Coral       | 4455                                  | 150                              | 4620                           | 4208 - 5022                   |
| 10            | Core 4 6E    | GX-6958  | -23.6069 | 152.0959 | -6.65           | Coral       | 4885                                  | 165                              | 5172                           | 4803 - 5573                   |
| 11            | Core 4 7B    | GX-6959  | -23.6069 | 152.0959 | -8.58           | Coral       | 5535                                  | 155                              | 5921                           | 5595 - 6250                   |
| 12            | Core 4 8B    | GX-6960  | -23.6069 | 152.0959 | -9.53           | Coral       | 5560                                  | 180                              | 5948                           | 5570 - 6315                   |
| 13            | Core 4 8F    | GX-6961  | -23.6069 | 152.0959 | -10.47          | Coral       | 6415                                  | 170                              | 6894                           | 6492 - 7292                   |
| 14            | Core 4 9B    | GX-6962  | -23.6069 | 152.0959 | -11.03          | Coral       | 6460                                  | 189                              | 6943                           | 6506 - 7348                   |
| 15            | Core 2 3     | NSW-289  | -23.5110 | 152.0918 | -0.465          | Coral       | 5290                                  | 126                              | 5658                           | 5382 - 5918                   |
| 16            | Core 2 4     | NSW-293  | -23.5110 | 152.0918 | -0.61           | Coral       | 5330                                  | 126                              | 5700                           | 5430 - 5980                   |
| 17            | Core 2 5     | NSW-301  | -23.5110 | 152.0918 | -0.76           | Coral       | 5380                                  | 155                              | 5753                           | 5431 - 6135                   |
| 18            | Core 2 7     | NSW-290  | -23.5110 | 152.0918 | -0.975          | Coral       | 5330                                  | 126                              | 5700                           | 5430 - 5980                   |
| 19            | Core 2 8     | NSW-302  | -23.5110 | 152.0918 | -1.105          | Coral       | 5310                                  | 126                              | 5679                           | 5393 - 5955                   |
| 20            | Core 2 10    | NSW-291  | -23.5110 | 152.0918 | -1.6            | Coral       | 5400                                  | 126                              | 5770                           | 5487 - 6061                   |
| 21            | Core 2 11    | NSW-298  | -23.5110 | 152.0918 | -1.765          | Coral       | 5310                                  | 126                              | 5679                           | 5393 - 5955                   |
| 22            | Core 2 12    | NSW-294  | -23.5110 | 152.0918 | -1.95           | Coral       | 5460                                  | 126                              | 5831                           | 5577 - 6135                   |
| 23            | Core 2 15    | NSW-299  | -23.5110 | 152.0918 | -2.29           | Coral       | 5310                                  | 126                              | 5679                           | 5393 - 5955                   |
| 24            | Core 2 20    | NSW-300  | -23.5110 | 152.0918 | -2.98           | Coral       | 5760                                  | 136                              | 6158                           | 5873 - 6453                   |
| 25            | Core 2 20    | NSW-295  | -23.5110 | 152.0918 | -2.98           | Coral       | 5780                                  | 136                              | 9180                           | 5888 - 6470                   |

|    |           |         |          |          |        |       |      |     |      |             |
|----|-----------|---------|----------|----------|--------|-------|------|-----|------|-------------|
| 26 | Core 2 22 | NSW-296 | -23.5110 | 152.0918 | -3.345 | Coral | 5680 | 136 | 6076 | 5756 - 6357 |
| 27 | Core 2 31 | NSW-308 | -23.5110 | 152.0918 | -5.9   | Coral | 6820 | 136 | 7329 | 7035 - 7572 |
| 28 | Core 2 36 | NSW-297 | -23.5110 | 152.0918 | -8.275 | Coral | 7440 | 136 | 7895 | 7623 - 8170 |

---

## 2. MICRO-ATOLLS AS SEA-LEVEL INDICATORS

Scoffin *et al.* (1978) originally commented on the significance of micro-atolls as sea-level indicators and found that the fossil micro-atolls grew to mean low water spring tide levels (MLWS, -1.2 m MSL for OTR). Micro-atolls in open water environments are considered the most accurate biological indicators of paleo sea levels due to their tightly restricted growth range at MLWS (Lewis *et al.* 2013). They have been shown to have an elevation variation of only  $\pm 10$  cm (Smithers and Woodroffe, 2000) unlike other biological indicators (Lewis *et al.*, 2008). Consequently, micro-atolls have been used in numerous studies when developing sea-level curves, with Lewis *et al.* (2013) using micro-atoll data (along with barnacles and oysters) to exclude potentially confounding results from less accurate biological indicators (such as beachrock and foraminifera). However, atoll elevation has been shown to vary from MLWS in environments where lagoons truncate the natural tidal range thereby artificially raising water level. In such environments, corals may grow up to MSL but commonly now higher than mean low water neap (MLWN) level. Smithers and Woodroffe (2000) found that micro-atolls in open water environments on the Cocos (Keeling) Islands would grow at elevations between MLWS and MLWN tides, hence MLWN is used as a lower vertical error range in Figure 2 of the manuscript.

The fossil microatolls sampled during this project are from unmoated open water environments on algal dominated environments with no surrounding coral cover. The images in Figures DR1 and DR2 show the typical appearance of the fossil micro-atolls on One Tree Reef and the environments where they are found; usually at the junction between the algal and rubble sections of the reef flat. It is likely that these were also open water environments when the atolls were living with no geomorphic evidence to suggest moating would have occurred on the reef flats in the past.

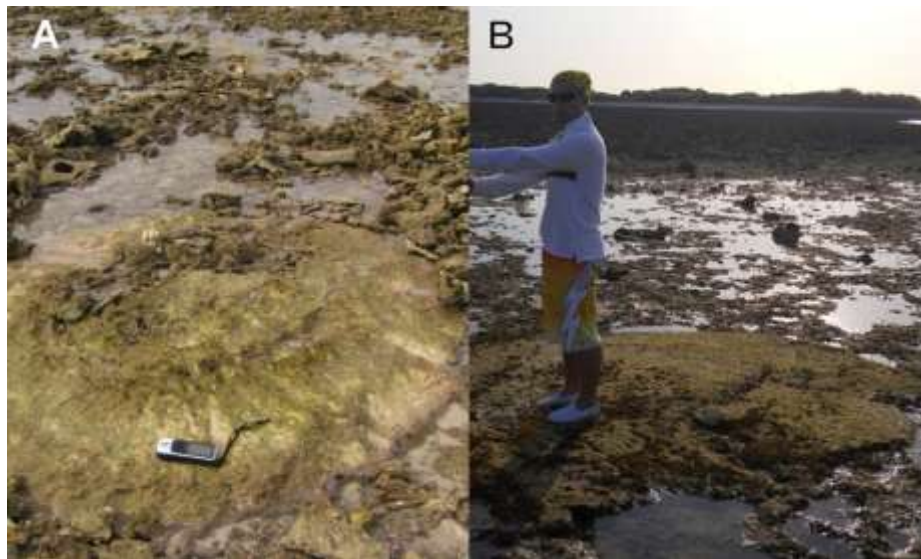

Figure DR1: a) Photo of a typical fossil micro-atoll in the northeast of One Tree Reef, located in the rubble at close to the algal rim; b) Photo of micro-atoll A2 during RTK-GNSS survey looking towards One Tree Island in a lagoonward direction. The atoll is located on the algal rim with the beginning of the rubble seen clearly behind the micro-atoll.

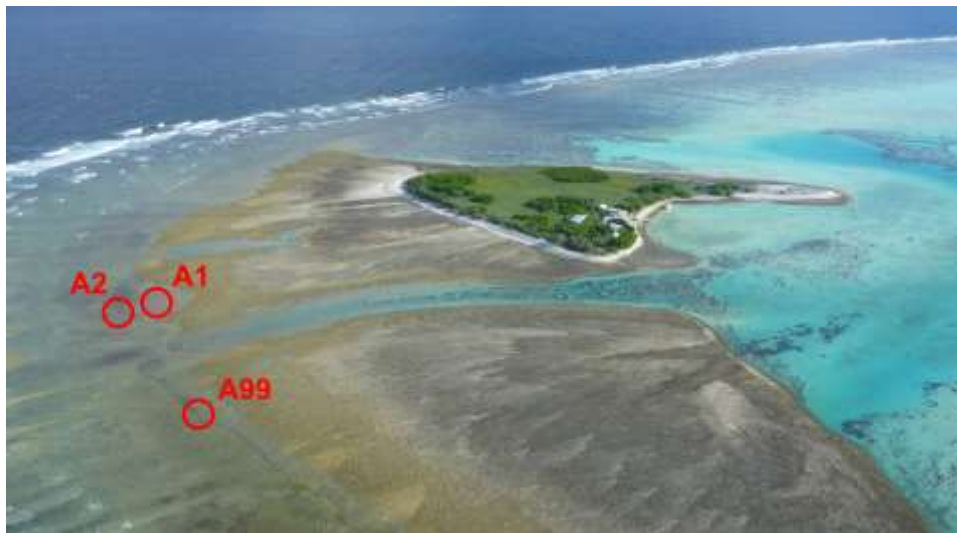

Figure DR2: Oblique photo taken during mid-tide conditions (exact tide not known) showing the location of microatolls on the algal rim of the southeastern reef flat near the beginning of the rubble flat. Source: D. Kaufmann

### 3. SEDIMENT CORES

#### 3.1 Eastern transect

The eastern core transect contained mostly coarse sand (mean grain size (D50)  $\approx$  800  $\mu$ m) with a gravel ( $>$  2000  $\mu$ m) unit located between -0.8 to -1.2 m MSL (Figure DR3). The gravel deposit in C5 consisted of mainly large mollusc shell and coral (mostly *Acropora sp.*) fragments. A large range of dates were also found in this deposit with ages varying from 558-3606 cal. yr. BP. The wide range of ages in the gravel layer of C5 suggests that this is a storm or cyclone deposit (Figure DR3). Deposits with similar depths (above 1.5 m), grainsize and composition to the gravel deposit in C5 are found in most cores with the exception of C15, which shows a gravel layer at a similar depth but not the large gravel grains found in the other cores.

The ages in core C5 show old dates for relatively shallow depths considering the Pleistocene base is at -13 m, with an age of 3576 cal. yr. BP at -1.6 m (Figure DR3). The ages get progressively younger towards the surface with 1722 cal. yr. BP at -1.4 and 603 cal. yr. BP at -0.9 m. In contrast C3 does is much younger with an age of 955 cal. yr. BP at -2.8 m getting progressively younger at shallower depths (Figure DR3). The younger ages and relatively fast sedimentation rates in C3 may be due to the location of the core on the sand apron. C3 is located in the southeast location of the sand apron as it slopes towards the lagoon. This location has much more dynamic sediment movement than the other transects with cores taken near the the lagoon extent of the sand apron (i.e. C14 and C15). The sedimentation in C3 represents one of the few locations showing recent ( $<$  1000 yrs) sedimentation and progradation of the sand apron. It is also one of the few locations to have undergone measurable accretion over the last three decades (Vila-Concejo et al., 2013).



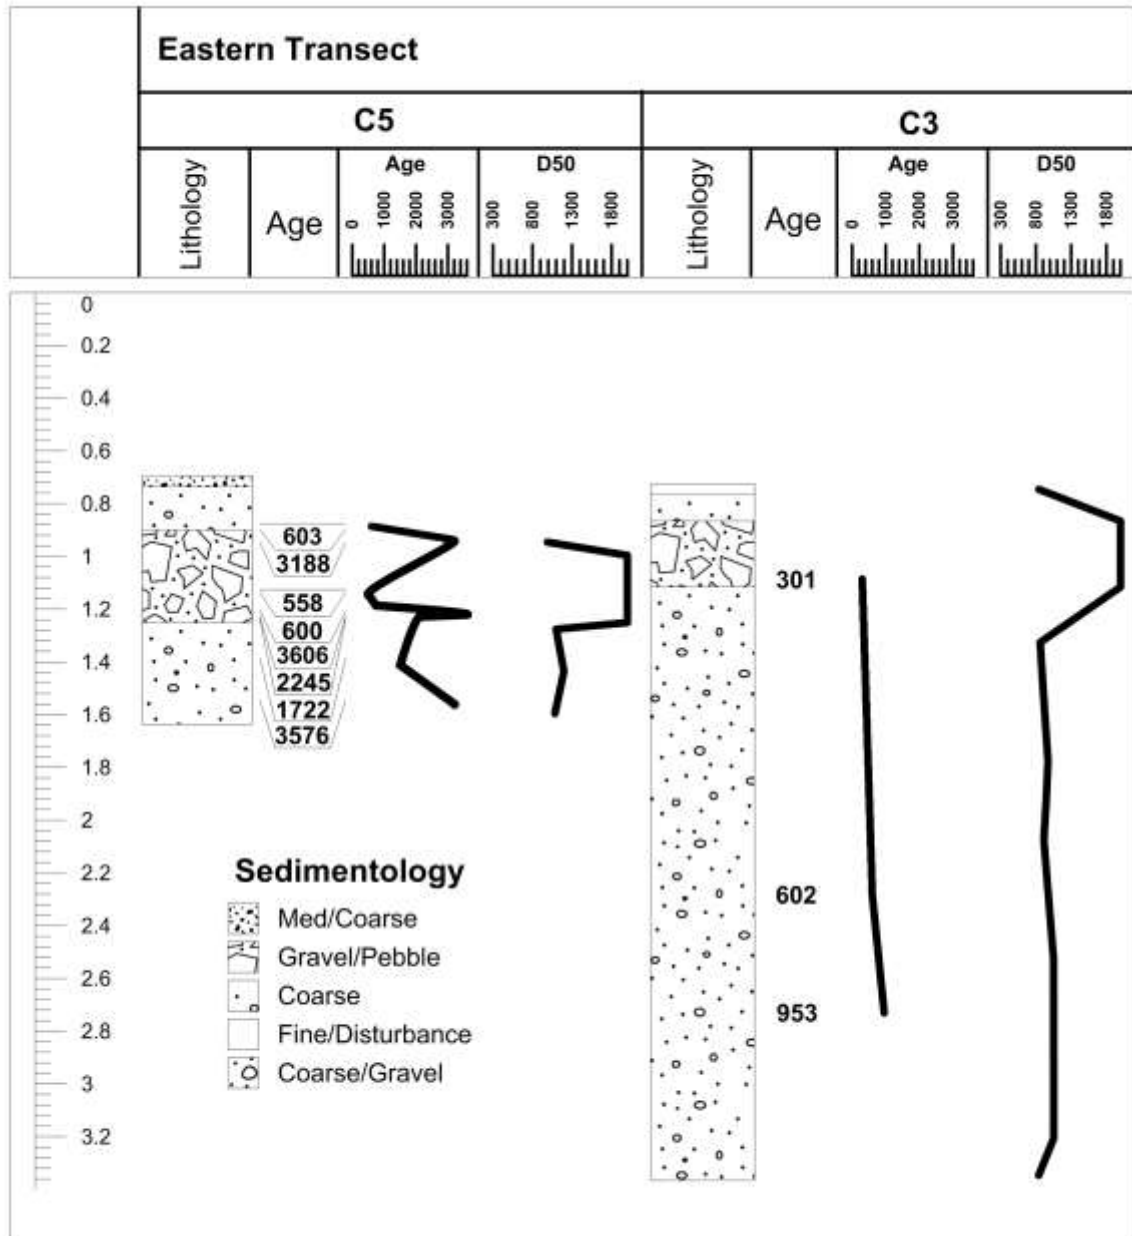

Figure DR3. Core logs of the eastern transect, with depth in MSL, mean grain size (D50), age in cal. yr. BP and sedimentology. Maximum grainsize is limited to 2000  $\mu\text{m}$  (2 cm) with grainsizes exceeding this value (mainly in the coarse gravel deposits) shown as 2000  $\mu\text{m}$  or greater. This was due to the poorly sorted sediment in the coarse deposits with an accurate mean grainsize difficult to determine.

### 3.2 Central transect

The cores in the central transect were mostly composed of to medium to coarse sand with the coarse storm deposit that was present in the eastern transect also found in this transect. Ages close to the reef flat were old at shallow depths with the oldest age in C12 near the reef flat of 3380 cal. yr. BP at -1.44 m. A relatively old age at shallow depths was also found near the lagoonward extent of the sand apron in C14 with 2829 cal. yr. BP at -2.01 m (Figure DR4). A rapid transition from an old to a younger layer occurred in C12 with ages of 2971 cal. yr. BP (-1.02 m) and 414 cal. yr. BP (-0.92 m) separated by 0.2 m. A similar trend was also observed in C14 where the ages of 2829 cal. yr. BP (-2 m) and 467 cal. yr. BP (-1.64 m) were separated by 0.4 m, both C12 and C14 have young ages above this point of rapid temporal transition (Figure DR3). Two of the three dates in C18 were discounted with one sample located in a storm deposit (2516 cal. yr. BP) and the other sample from the base of the core affected by core disturbance after extraction indicated by very fine sediment due to water seepage through the base of the core (1899 cal. yr. BP).

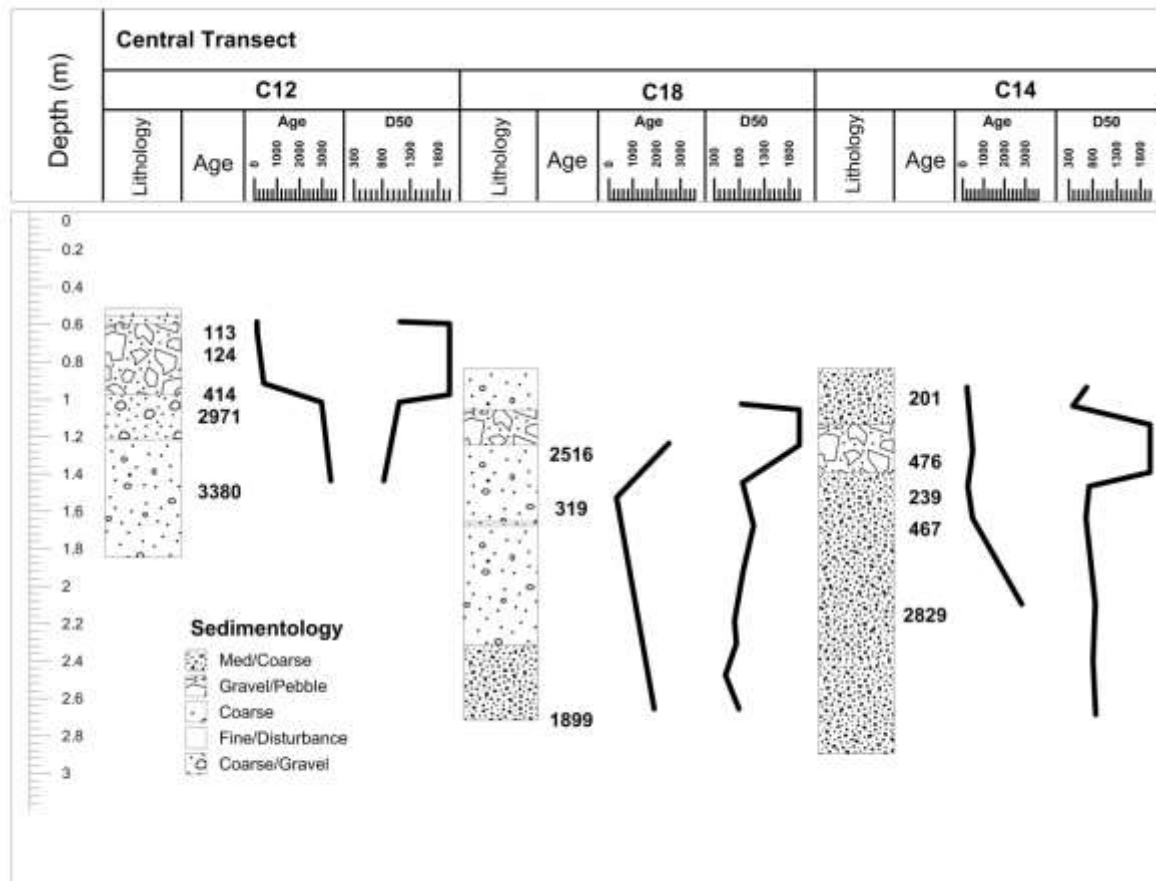

Figure DR4. Core logs of the central transect with depth in MSL, age in cal. yr. BP and D50 mean grain size.

### 3.3 Western Transect

The cores in the western are mainly composed of medium to coarse sand with the storm deposit most apparent in C6 near the reef flat with no gravel layer found in C15. Old ages are again observed in C6 and C15 with the oldest in C6, 3188 cal. yr. BP at -1.6 m and in C15, 2598 cal. yr. BP at -1.8 m (Figure DR5). Age reversals were apparent which were most likely due to the selection of foraminifera that underwent extensive post-mortem transport before burial. This was due to the difficulty of obtaining pristine samples in some instance in the western transect.

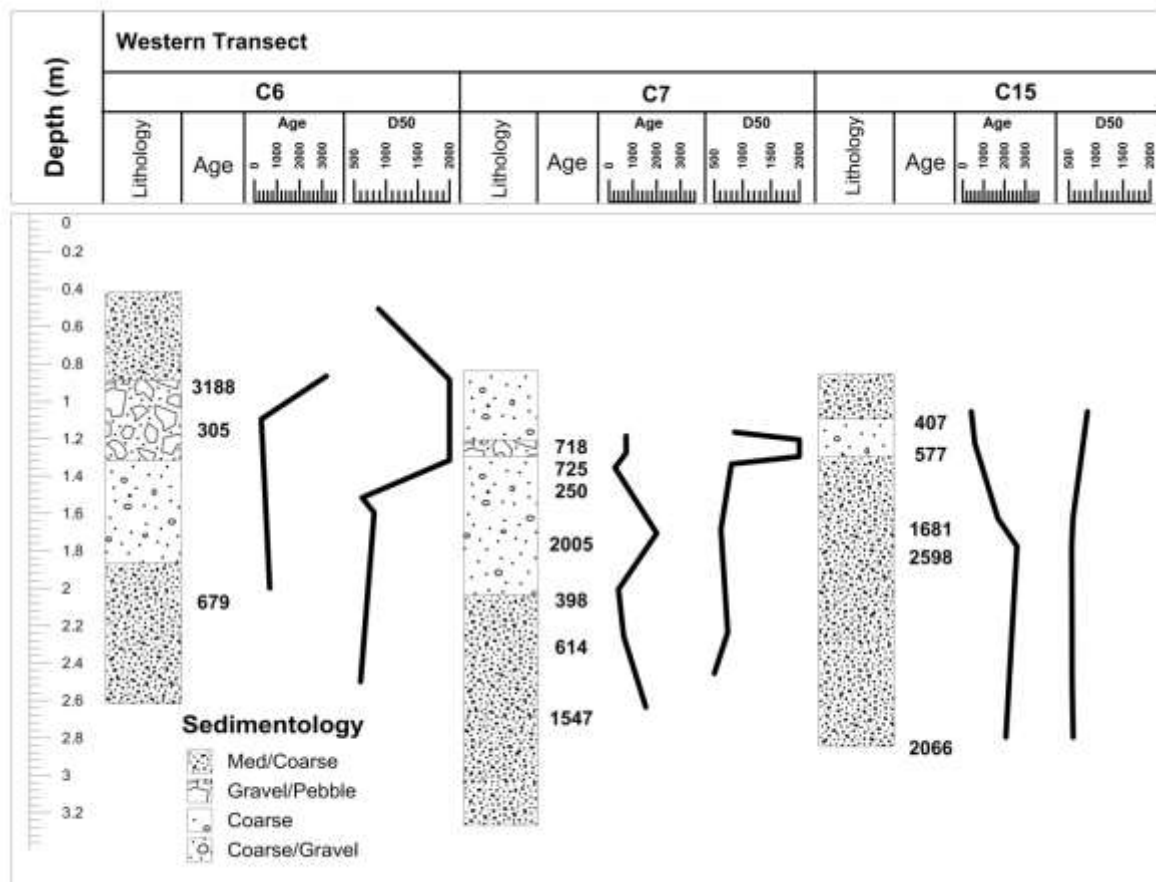

Figure DR5. Core logs of the western transect with depth in MSL, age in cal. yr. BP and D50 mean grain size.

## References for Data Repository

- Druffel, E. R. M., and Griffin, S., 2004, Southern Great Barrier Reef Coral Radiocarbon DataI. IGBP PAGES/World Data Center for Paleoclimatology, Data Contribution Series #2004-093, NOAA/NCDC Paleoclimatology Program: Boulder CO, USA.
- Fink, D., Hotchkis, M., Hua, Q., Jacobsen, G., Smith, A. M., Zoppi, U., Child, D., Mifsud, C., van der Gaast, H., Williams, A., and Williams, M., 2004, The ANTARES AMS facility at ANSTO. : Nuclear Instruments and Methods in Physics Research B, v. 223-224, p. 109-115.
- Lewis, S. E., Sloss, C. R., Murray-Wallace, C. V., Woodroffe, C. D., and Smithers, S. G., 2013, Post-glacial sea-level changes around the Australian margin: a review: Quaternary Science Reviews, v. 74, p. 115-138.
- Lewis, S. E., Wüst, R. A. J., Webster, J. M., and Shields, G. A., 2008, Mid-late Holocene sea-level variability in eastern Australia: Terra Nova, v. 20, no. 1, p. 74-81.
- Marshall, J. F., and Davies, P. J., 1982, Internal structure and Holocene evolution of One Tree Reef, southern Great Barrier Reef: Coral Reefs, v. 1, no. 1, p. 21-28.
- Reimer, P. J., Bard, E., Bayliss, A., Beck, J. W., Blackwell, P. G., Ramsey, C. B., Buck, C. E., Cheng, H., Edwards, R. L., and Friedrich, M., 2013, IntCal13 and Marine13 radiocarbon age calibration curves 0–50,000 years cal BP: Radiocarbon, v. 55, no. 4, p. 1869-1887.
- Scoffin, T. P., Stoddart, D. R., and Rosen, B. R., 1978, The Nature and Significance of Microatolls: Philosophical Transactions of the Royal Society of London. B, Biological Sciences, v. 284, no. 999, p. 99-122.

Smithers, S. G., and Woodroffe, C. D., 2000, Microatolls as sea-level indicators on a mid-ocean atoll: *Marine Geology*, v. 168, no. 1–4, p. 61-78.

Stuiver, M., Reimer, P. J., and Reimer, R. W., 2005, CALIB 5.0, [www.calib.org](http://www.calib.org).

Vila-Concejo, A., Harris, D. L., Shannon, A. M., Webster, J. M., and Power, H. E., 2013, Coral reef sediment dynamics: evidence of sand-apron evolution on a daily and decadal scale: *Journal of Coastal Research*, v. SI 65.
